# Supplementary material for: Utilizing Social Media to Study Information-Seeking and Ethical Issues in Gene Therapy
Source: J Med Internet Res. 2013 Mar 4;15(3):e44. doi: 10.2196/jmir.2313 (PMC3636301; doi:10.2196/jmir.2313)
Supplement: Supplementary file 1 [file jmir_v15i3e44_app1.pdf]

Appendix 1. Diseases and conditions mentioned in question sample.

| Disease or condition      |                                |
|---------------------------|--------------------------------|
| Acne                      | Kidney failure                 |
| Adrenoleukodystrophy      | Klinefelter syndrome           |
| Albinism                  | Lactose intolerance            |
| Alcoholism                | Leber congenital amaurosis     |
| Alzheimer disease         | Limb-girdle muscular dystrophy |
| Cancer                    | Lymphedema                     |
| Celiac disease            | Maple syrup urine disease      |
| Cleft lip                 | Mental retardation             |
| Cold sores                | Myalgic encephalomyelitis      |
| Color blindness           | Obsessive-compulsive disorder  |
| Common cold               | Paget disease                  |
| Cystic fibrosis           | Parkinson disease              |
| Degenerative disc disease | Porphyria                      |
| Diabetes                  | Psoriasis                      |
| Dilated cardiomyopathy    | Retinitis pigmentosa           |
| Down syndrome             | Rett syndrome                  |
| Dwarfism                  | Rh disease                     |
| Dyslexia                  | Scars                          |
| Erectile dysfunction      | Schizophrenia                  |
| Fatal familial insomnia   | SCID                           |
| G6PD deficiency           | Sickle cell anemia             |
| Hemophilia                | Tongue thrust disorder         |
| HIV                       | Turner syndrome                |
| Hurler syndrome           |                                |
